# Supplementary material for: Synthetic Conditions, Physical Properties, and Antibacterial Activities of Silver Nanoparticles with Exopolysaccharides of a Medicinal Fungus
Source: MDPI journal article supplement (doi:10.3390/ma15165620), 2022-08-16
Supplement: s1 [file s1]

## Supplementary Materials

“Yang and Wu: Synthetic conditions, physical properties and antibacterial activities of silver nanoparticles with exopolysaccharides of a medicinal fungus”

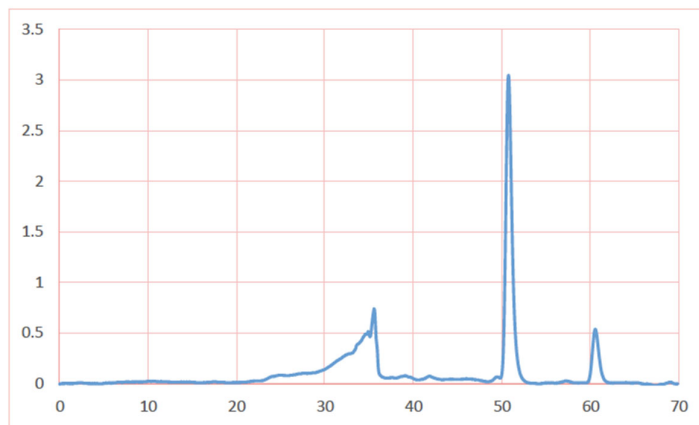

**Figure S1.** HPGPC spectrum for the molecular weight distribution of EPS-1.

**Table S1.** Molecular weight distribution of EPS-1.

| Retention time (min) | Molecular weight (Da) | % Area |
|----------------------|-----------------------|--------|
| 35.622               | 649883                | 28.72  |
| 50.831               | 222                   | 60.37  |
| 60.663               | 60.663                | 10.92  |

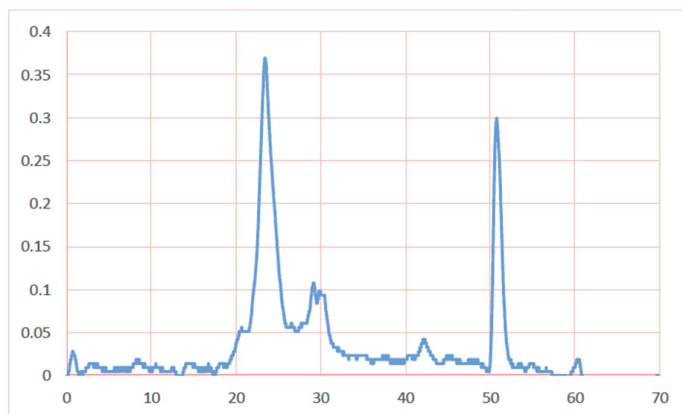

**Figure S2.** HPGPC spectrum for the molecular weight distribution of EPS-2

**Table S2.** Molecular weight distribution of EPS-2

| Retention time (min) | Molecular weight (Da) | % Area |
|----------------------|-----------------------|--------|
| 23.450               | 386036950             | 56.92  |
| 29.283               | 18083149              | 8.33   |
| 50.817               | 224                   | 29.36  |
| 60.633               | 60.633                | 2.59   |

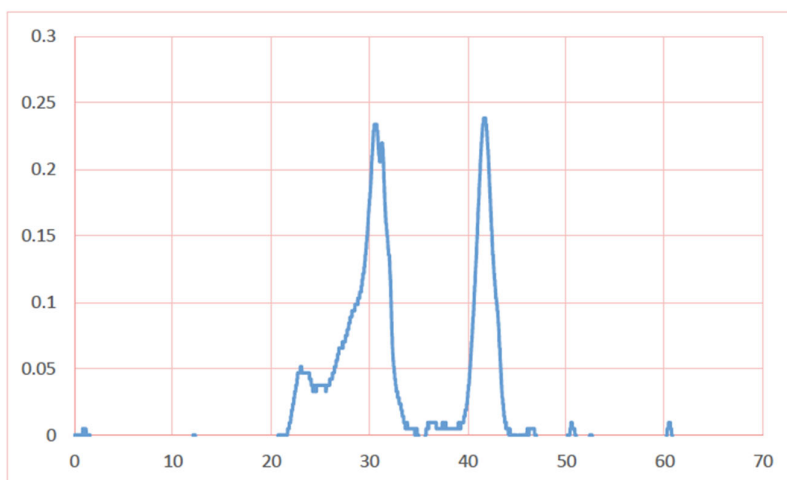

**Figure S3.** HPGPC spectrum for the molecular weight distribution of EPS-3

**Table S3.** Molecular weight distribution of EPS-3

| Retention time (min) | Molecular weight (Da) | % Area |
|----------------------|-----------------------|--------|
| 30.567               | 9221806               | 65.14  |
| 41.9                 | 24103                 | 34.86  |

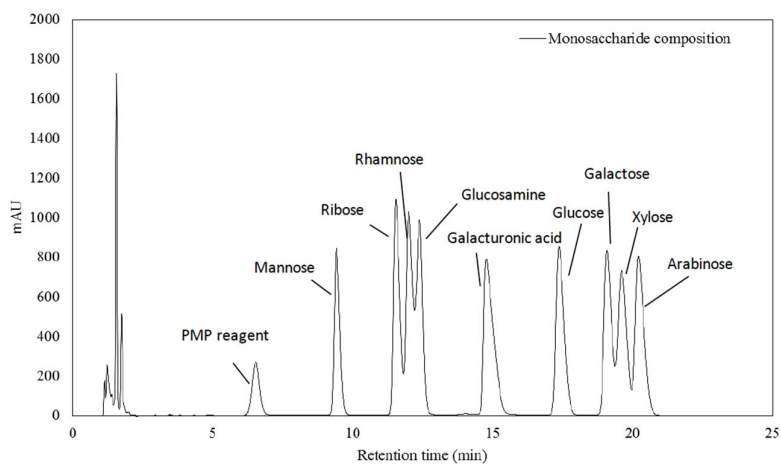

**Figure S4.** HPLC of monosaccharide standards.

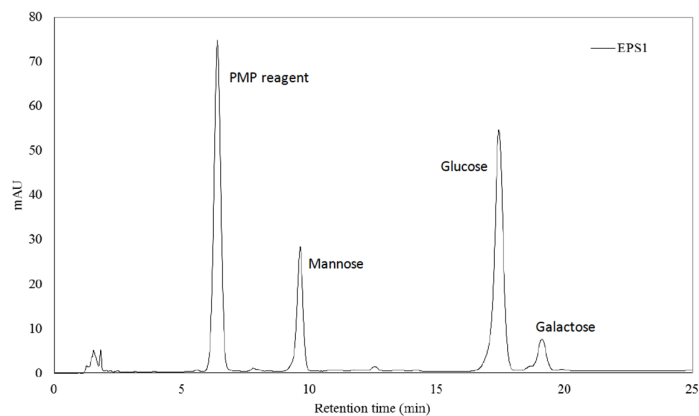

**Figure S5.** HPLC analysis of monosaccharide composition of EPS-1.

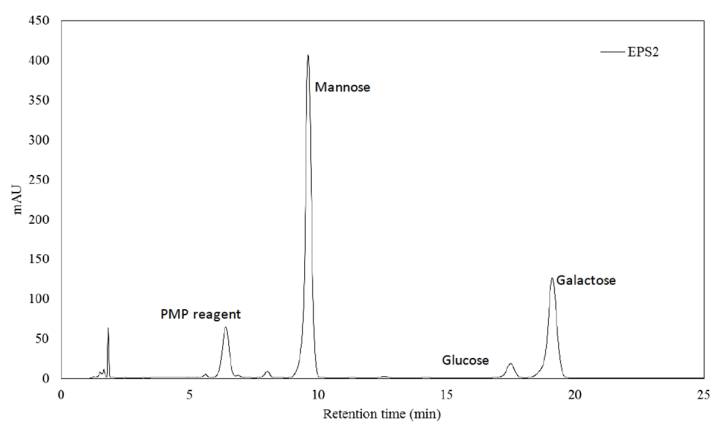

**Figure S6.** HPLC analysis of monosaccharide composition of EPS-2.

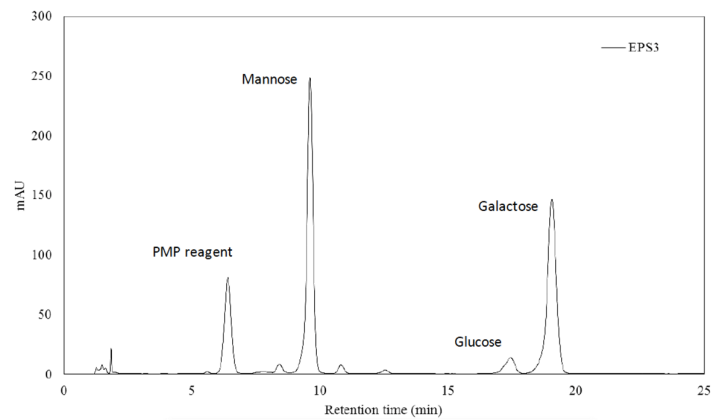

**Figure S7.** HPLC analysis of monosaccharide composition of EPS-3.

(a)

$\beta$ -D-Galf

1

↓

3

{[6)- $\beta$ -D-Glcp-(1→4)- $\alpha$ -D-Manp-(1→4)- $\alpha$ -D-Glcp-(1)<sub>2</sub>→6)- $\alpha$ -D-Glcp-(1→[3)- $\alpha$ -D-Manp-(1→4)- $\alpha$ -D-Glcp-(1)<sub>2</sub>→]<sub>n</sub>}

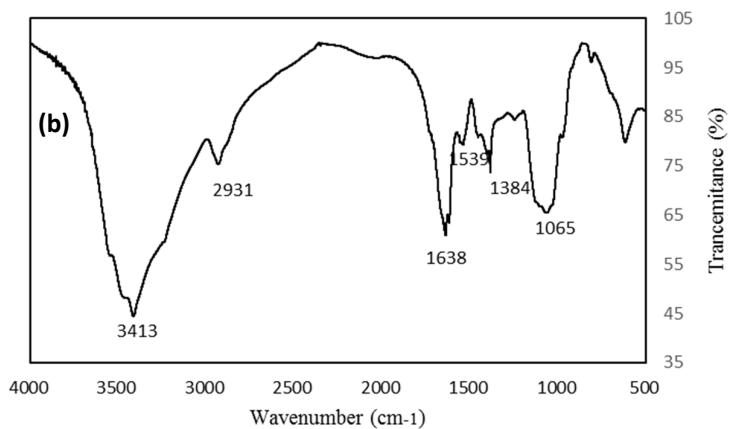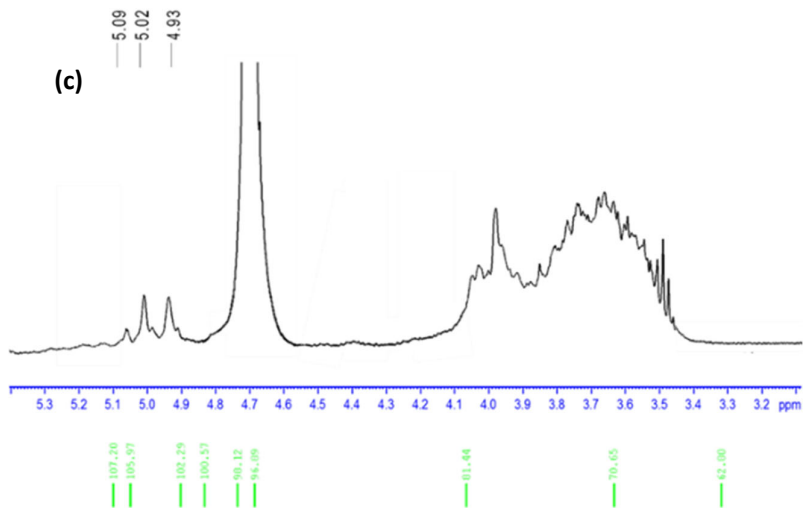

(d)

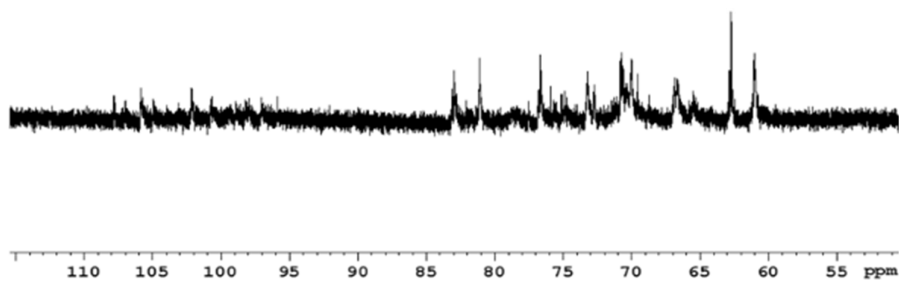

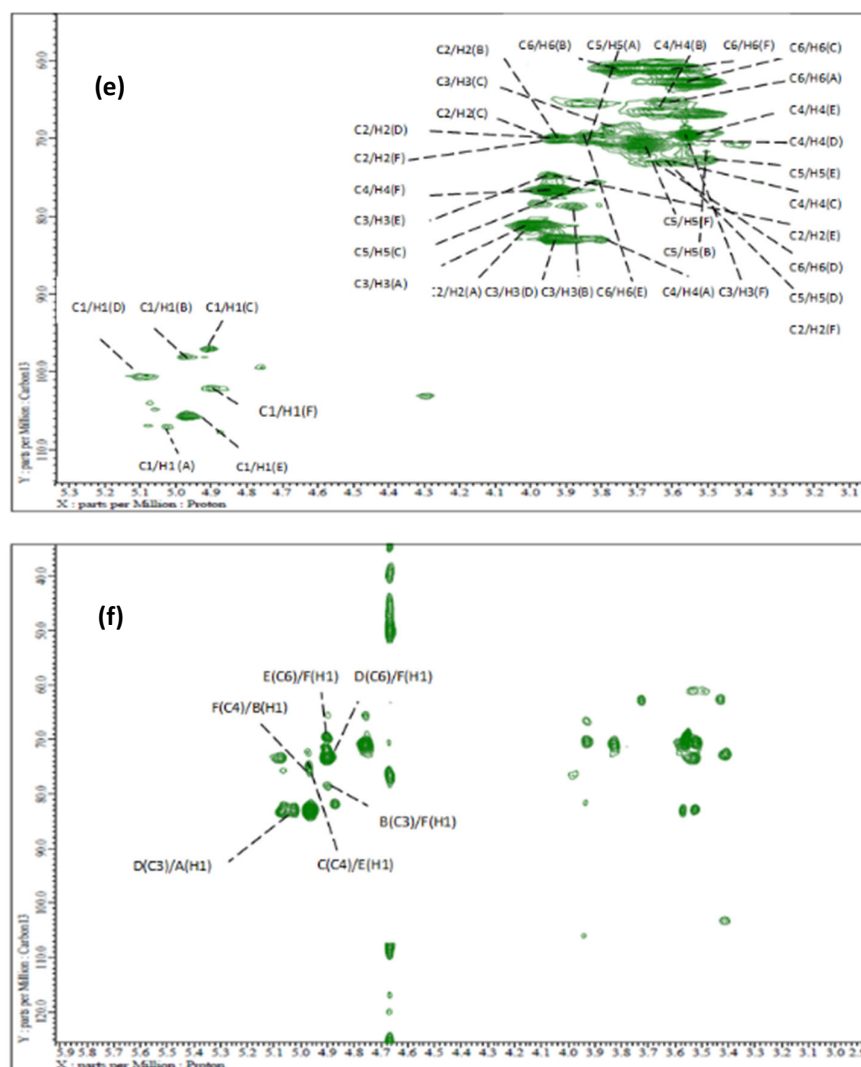

**Figure S8** Structure analysis and characterization of EPS-3: (a) Repeating structure unit of an EPS fraction; (b) FT-IR spectrum; (c)  $^1\text{H}$  NMR spectrum; (d)  $^{13}\text{C}$  NMR spectrum; (e) HSQC NMR spectrum (2D); (f) HMBC spectrum (2D).

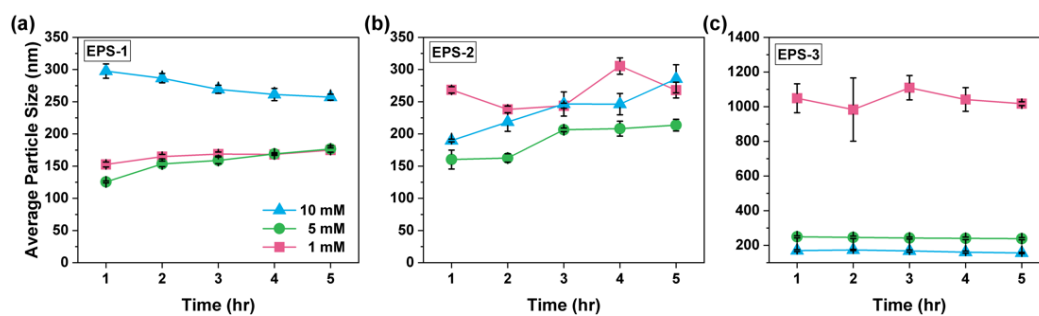

**Figure S9.** Average particle size of Ag NPs synthesized with 0.5 g/L EPS and various concentration of AgNO<sub>3</sub> (1, 5 and 10 mM) for (a) EPS-1, (b) EPS-2 and (c) EPS-3 as a function of reaction time. All the above experiments were conducted in the dark at 100 °C.

**Table S4.** The particle size comparison of Ag NPs synthesized with different EPS before and after dialysis.

| EPS-Ag NPs   | Particle hydro-diameter (nm) |                |
|--------------|------------------------------|----------------|
|              | Before dialysis              | After dialysis |
| EPS-1 Ag NPs | 158.9 ± 5.1                  | 241.5 ± 3.3    |
| EPS-2 Ag NPs | 245.0 ± 17.0                 | 430.0 ± 22.5   |
| EPS-3 Ag NPs | 206.4 ± 3.6                  | 397.8 ± 8.9    |
